# Supplementary material
Source: Research Square preprint supplement (doi:10.21203/rs.3.rs-9100031/v1)
Supplement: Supplementary file 1 [file 30cfe328b98a2861903626c6.pdf]

Supplemental Table 1. Associations between patients surviving for more than 5 years after PDAC diagnosis and various factors in the HC cohort

|                                          | Univariable analysis |                | Multivariable analysis |                |
|------------------------------------------|----------------------|----------------|------------------------|----------------|
|                                          | OR (95% CI)          | <i>P</i> value | OR (95% CI)            | <i>P</i> value |
| Male                                     | 0.630 (0.142–2.797)  | 0.544          |                        |                |
| Age ≤ 65 years                           | 5.419 (0.630–45.589) | 0.124          |                        |                |
| No smoking habit                         | 0.718 (0.187–3.260)  | 0.735          |                        |                |
| No drinking habit                        | 0.461 (0.108–1.964)  | 0.295          |                        |                |
| Body mass index ≤ 22.0 kg/m <sup>2</sup> | 1.700 (0.318–9.075)  | 0.535          |                        |                |
| Comorbidities and past histories         |                      |                |                        |                |
| No history of hypertension               | 1.355 (0.305–6.027)  | 0.690          |                        |                |
| No history of diabetes                   | 1.556 (0.290–8.331)  | 0.606          |                        |                |
| No history of hyperlipidemia             | 3.886 (0.449–33.629) | 0.218          |                        |                |
| No history of malignant tumor            | 1.804 (0.620–5.247)  | 0.279          |                        |                |
| Non                                      | 3.214 (0.650–15.895) | 0.152          |                        |                |
| Family history                           |                      |                |                        |                |
| No family history of malignancy          | 0.607 (0.144–2.554)  | 0.496          |                        |                |
| Blood test at PDAC diagnosis             |                      |                |                        |                |
| Glycated hemoglobin ≤ 6.5%               | 1.853 (0.348–9.864)  | 0.470          |                        |                |
| CEA ≤ 5 ng/mL                            | 3.886 (0.449–33.629) | 0.218          |                        |                |
| CA19-9 ≤ 37 U/mL                         | 3.474 (0.778–15.513) | 0.103          |                        |                |
| Trigger for diagnosis                    |                      |                |                        |                |
| Transabdominal US                        | 0.662 (0.158–2.775)  | 0.572          |                        |                |
| Abdominal CT                             | 1.233 (0.272–5.584)  | 0.785          |                        |                |
| Abdominal MRI                            | 2.042 (0.188–22.135) | 0.557          |                        |                |
| Tumor location                           |                      |                |                        |                |
| Head                                     | 0.741 (0.179–3.073)  | 0.679          |                        |                |
| Body                                     | 2.982 (0.683–13.016) | 0.146          |                        |                |
| Tail                                     | 0.339 (0.039–2.964)  | 0.328          |                        |                |
| Imaging findings                         |                      |                |                        |                |
| Tumor size ≤ 20 mm                       | 6.667 (1.448–30.747) | <b>0.015</b>   | 6.667 (1.448–30.747)   | <b>0.015</b>   |
| Main pancreatic duct dilatation < 3 mm   | 1.500 (0.328–6.868)  | 0.601          |                        |                |
| No coexistence of IPMN                   | 2.667 (0.304–23.392) | 0.376          |                        |                |

Note: Bold values indicate  $P < 0.05$ . Abbreviations: CA19-9, carbohydrate antigen 19-9; CEA, carcinoembryonic antigen; CI, confidence interval; CT, computed tomography; HC cohort, health checkup cohort; IPMN, intraductal papillary mucinous neoplasm; MRI, magnetic resonance imaging; OR, odds ratio; PDAC, pancreatic ductal adenocarcinoma; US, ultrasonography.
